# Supplementary material for: Design of salt-responsive and regenerative antibacterial polymer brushes with integrated bacterial resistance, killing, and release properties
Source: Royal Society of Chemistry journal article supplement (doi:10.1039/c9tb01313j), 2019-01-01
Supplement: c9tb01313j1.pdf [file c9tb01313j1.pdf]

## SUPPORT INFORMATION

### Design of Salt-Responsive and Regenerative Antibacterial Polymer Brushes with Integrating Bacterial Resistance, Killing, and Release Properties

Yang Wang<sup>†</sup>, Jiahui Wu<sup>†</sup>, Dong Zhang<sup>¶</sup>, Feng Chen<sup>†</sup>, Ping Fan<sup>†</sup>, Mingqiang Zhong<sup>†</sup>,  
Shengwei Xiao<sup>‡</sup>, Yung Chang<sup>‡</sup>, Xiong Gong<sup>§</sup>, Jintao Yang<sup>\*†</sup>, and Jie Zheng<sup>\*¶</sup>

<sup>†</sup> College of Materials Science & Engineering  
Zhejiang University of Technology, Hangzhou 310014, China

<sup>‡</sup> School of Pharmaceutical and Chemical Engineering  
Taizhou University, Jiaojiang 318000, China

<sup>‡</sup> Department of Chemical Engineering  
R&D Center for Membrane Technology  
Chung Yuan Christian University, Chungli, Taiwan

<sup>§</sup> Department of Polymer Engineering  
The University of Akron, Akron, Ohio 44325, USA

<sup>¶</sup> Department of Chemical and Biomolecular Engineering  
The University of Akron, Akron, Ohio 44325, USA

**\*Corresponding Author:** (J.Y.) [yangjt@zjut.edu.cn](mailto:yangjt@zjut.edu.cn); (J.Z.) [zhengj@uakron.edu](mailto:zhengj@uakron.edu)

**Keywords:** Antibacterial surface; Polymer brushes; Antifouling; Antibacterial; Bacteria release

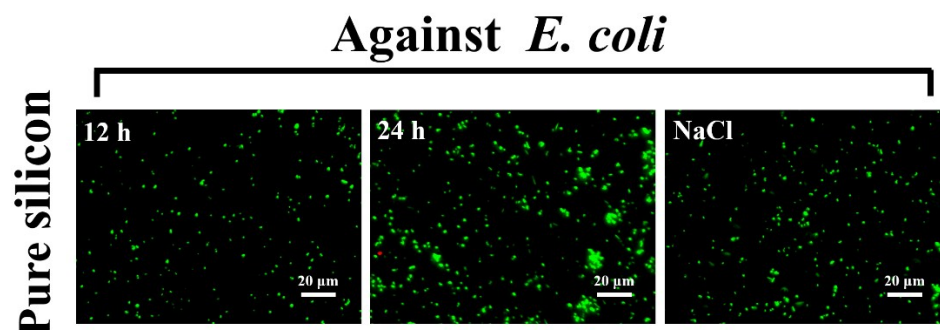

**Figure S1.** Fluorescence microscopy images of *E. coli* on pure silicon wafer upon different incubation times, followed by the treatment with 1.0 M NaCl solution.

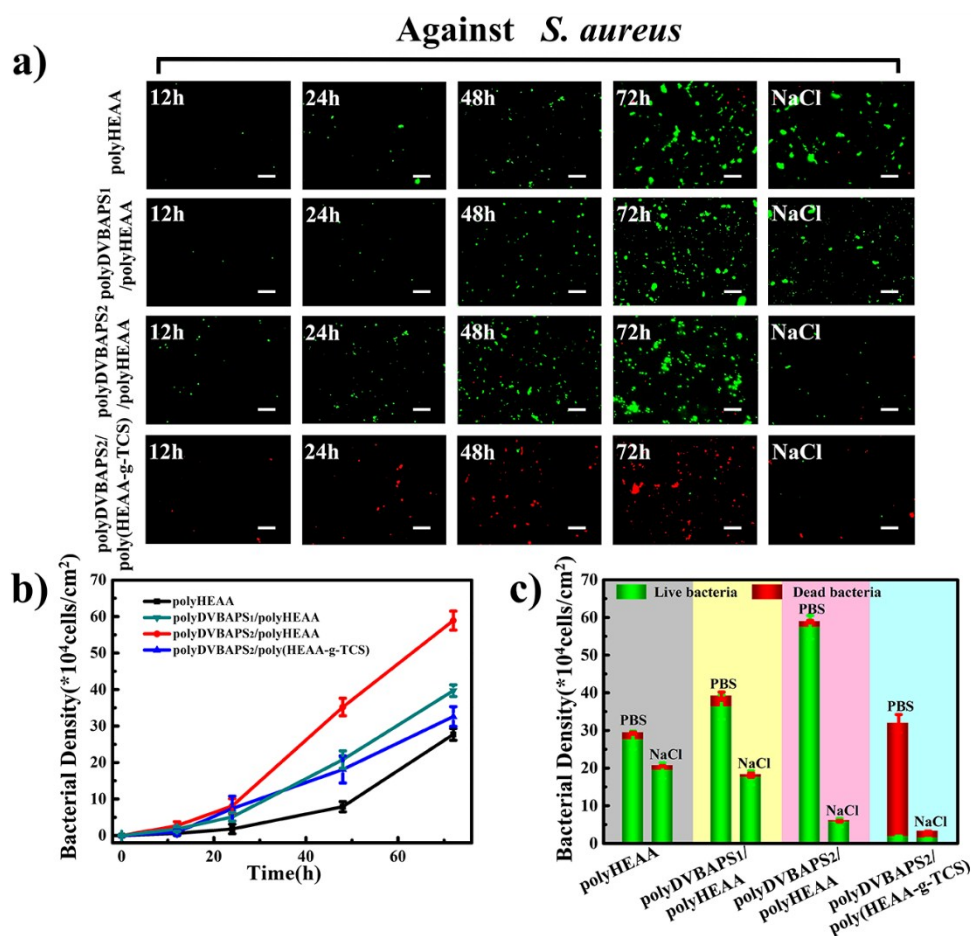

**Figure S2.** Overall antibacterial performance combining bacterial resistance, killing, and release of polyDVBAPS/polyHEAA-based brushes using *S. aureus*. (a) Representative fluorescence microscopy images (scale bar is 20  $\mu$ m) and (b) the corresponding statistical results of *S. aureus* on polyHEAA, polyDVBAPS<sub>1</sub>/polyHEAA, polyDVBAPS<sub>2</sub>/polyHEAA, polyDVBAPS<sub>2</sub>/poly(HEAA-g-TCS) brushes at different incubation times. (c) Comparison of bacterial density before and after the treatment of 1.0 M NaCl solution to determine bacterial release ratio.

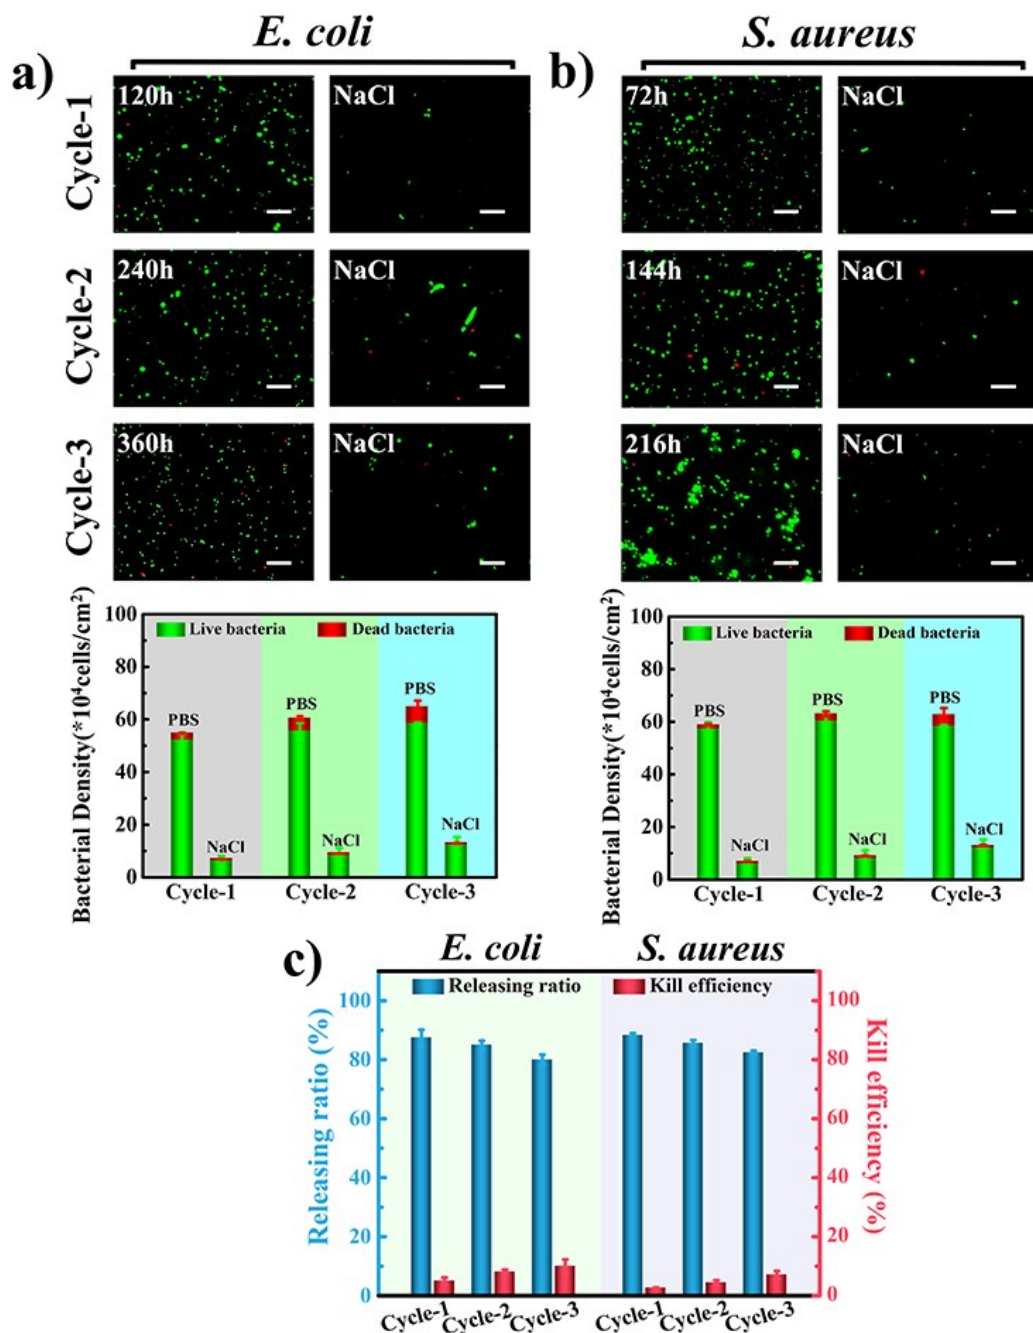

**Figure S3.** Overall antibacterial performance (e.g. antifouling, bactericidal, and bacteria release properties) and salt-induced surface regeneration of polyDVBAPS<sub>2</sub>/polyHEAA brush in multiple and reversible cycles, as evidenced by fluorescence microscopy images (scale bar=20  $\mu$ m) and the corresponding live/dead cell analysis for (a) *E. coli* and (b) *S. aureus*. (c) Cyclic bacterial killing and release of polyDVBAPS<sub>2</sub>/polyHEAA brush against *E. coli* and *S. aureus* upon the treatment of 1.0 M NaCl solution.

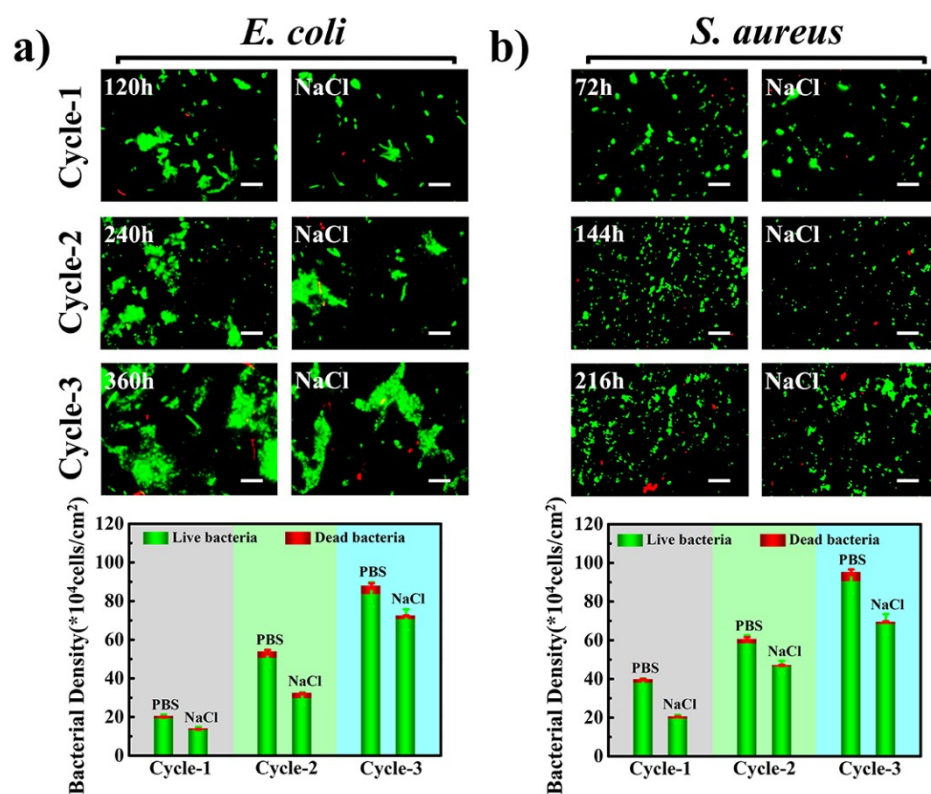

**Figure S4.** Overall antibacterial performance (e.g. antifouling, bactericidal, and bacteria release properties) and salt-induced surface regeneration of polyHEAA brush in multiple and reversible cycles, as evidenced by fluorescence microscopy images (scale bar=20  $\mu$ m) and the corresponding live/dead cell analysis for (a) *E. coli* and (b) *S. aureus*.

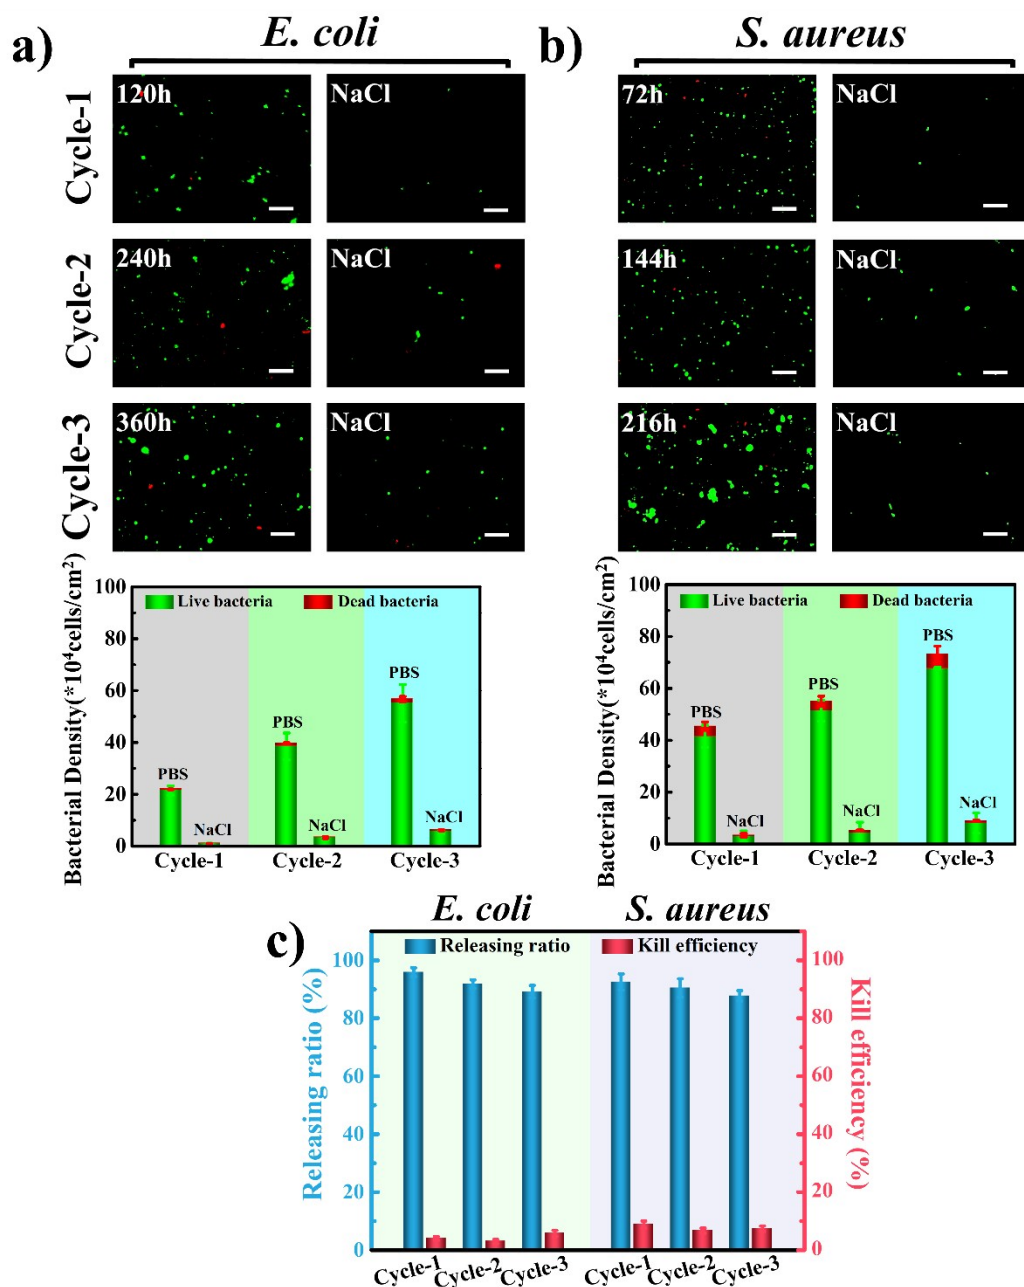

**Figure S5.** Overall antibacterial performance (e.g. antifouling, bactericidal, and bacteria release properties) and salt-induced surface regeneration of poly(DVBAP-b-HEAA) brush in multiple and reversible cycles, as evidenced by fluorescence microscopy images (scale bar=20  $\mu$ m) and the corresponding live/dead cell analysis for (a) *E. coli* and (b) *S. aureus*. (c) Cyclic bacterial killing and release of poly(DVBAP-b-HEAA) brush against *E. coli* and *S. aureus* upon the treatment of 1.0 M NaCl solution.
